# Supplementary material for: Association between urban green space and postpartum depression, and the role of physical activity: a retrospective cohort study in Southern California
Source: PubMed Central journal article supplement — Lancet Reg Health Am. 2023 Mar 6;21:100462. doi: 10.1016/j.lana.2023.100462 (PMC10201204; doi:10.1016/j.lana.2023.100462), 2023-03-06
Supplement: mmc1.pdf [file mmc1.pdf]

---

## Supplementary appendix

### Association between urban green space and postpartum depression, and the role of physical activity: a retrospective cohort study in Southern California

#### Authors:

Yi Sun<sup>a, b</sup> PhD, John Molitor<sup>c</sup> PhD, Tarik Benmarhnia<sup>d</sup> PhD, Chantal Avila<sup>e</sup> MA, Vicki Chiu<sup>e</sup> MS, Jeff Slezak<sup>e</sup> MS, David A. Sacks<sup>e, f</sup> MD, Jiu-Chiuan Chen<sup>g</sup> MD, Darios Getahun<sup>e, h\*</sup> MD, Prof Jun Wu<sup>b\*</sup> PhD

a. Institute of Medical Information, Chinese Academy of Medical Sciences and Peking Union Medical College, Beijing, China.

b. Department of Environmental and Occupational Health, Program in Public Health, University of California, Irvine, CA, USA.

c. College of Public Health and Human Sciences, Oregon State University, Corvallis, OR 97331, USA.

d. Scripps Institution of Oceanography, University of California, San Diego, 9500 Gilman Drive #0725, CA La Jolla 92093, USA.

e. Department of Research & Evaluation, Kaiser Permanente Southern California, Pasadena, CA, USA.

f. Department of Obstetrics and Gynecology, University of Southern California, Keck School of Medicine, Los Angeles, CA, USA.

g. Departments of Population & Public Health Sciences and Neurology, University of Southern California, Los Angeles, CA 90033, USA.

h. Department of Health Systems Science, Kaiser Permanente Bernard J. Tyson School of Medicine, Pasadena, CA, USA.

\* Equal contribution senior authors

#### Corresponding authors

Jun Wu, PhD  
junwu@hs.uci.edu

Darios Getahun, MD, PhD, MPH  
Darios.T.Getahun@kp.org

---

**TABLE OF CONTENTS**

|                                                                                                                                                                                                              | <b>Page</b> |
|--------------------------------------------------------------------------------------------------------------------------------------------------------------------------------------------------------------|-------------|
| <b>Supplementary Figure S1.</b> Study cohort composition.                                                                                                                                                    | <b>3</b>    |
| <b>Supplementary Table S1.</b> ICD9/10 diagnostic codes and medications used to ascertain postpartum depression diagnosis.                                                                                   | <b>4</b>    |
| <b>Supplementary Table S2.</b> Summary statistics of green space indicators and physical activity levels.                                                                                                    | <b>5</b>    |
| <b>Supplementary Table S3.</b> Associations between residential green space and maternal postpartum depression among urban population.                                                                       | <b>7</b>    |
| <b>Supplementary Table S4.</b> Adjusted odds ratios (ORs) and 95% confidence intervals (CI) of postpartum depression associated with street view based total green space (500 m) among population subgroups. | <b>9</b>    |
| <b>Supplementary Table S5.</b> Percent change and 95% confidence intervals of associations between green space and physical activity during the entire pregnancy.                                            | <b>10</b>   |

**Supplementary Figure S1. Study cohort composition.**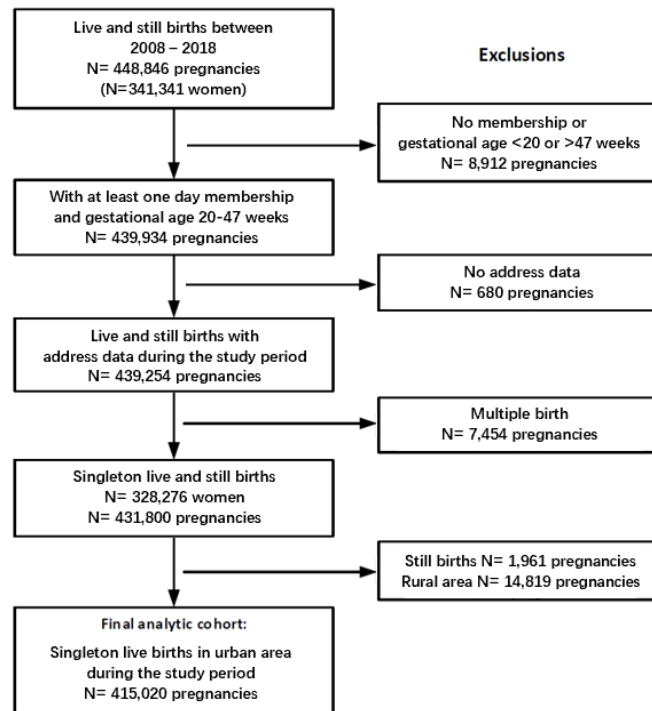

---

**Supplementary Table S1. ICD9/10 diagnostic codes and medications used to ascertain postpartum depression diagnosis.**

| <b>ICD-9-CM<br/>Code</b> | <b>ICD-10-CM<br/>Code</b> | <b>Medications</b> |
|--------------------------|---------------------------|--------------------|
| 300.4                    | F32.9                     | Bupropion          |
| 309.0                    | F33.0                     | Celexa             |
| 311                      | F33.2                     | Citalopram         |
|                          | F33.3                     | Cymbalta           |
|                          | F33.41                    | Desvenlafaxine     |
|                          | F33.9                     | Duloxetine         |
|                          | F34.1                     | Effexor            |
|                          | F43.21                    | Escitalopram       |
|                          | F53.0                     | Fluoxetine         |
|                          |                           | Lexapro            |
|                          |                           | Paroxetine         |
|                          |                           | Paxil              |
|                          |                           | Pristiq            |
|                          |                           | Prozac             |
|                          |                           | Sertraline         |
|                          |                           | Venlafaxine        |
|                          |                           | Wellbutrin         |
|                          |                           | Zoloft             |

**Supplementary Table S2. Summary statistics of green space indicators and physical activity levels.**

| <b>Exposures</b>                                                                        | <b>Mean</b> | <b>SD</b> | <b>Min</b> | <b>25th</b> | <b>50th</b> | <b>75th</b> | <b>Max</b> | <b>N</b> |
|-----------------------------------------------------------------------------------------|-------------|-----------|------------|-------------|-------------|-------------|------------|----------|
| <b>Individual green space exposure</b>                                                  |             |           |            |             |             |             |            |          |
| <b>Street view green space 200m, %</b>                                                  |             |           |            |             |             |             |            |          |
| Total green space                                                                       | 25.28       | 5.04      | 12.79      | 21.71       | 24.19       | 27.70       | 64.41      | 415020   |
| Tree                                                                                    | 15.62       | 5.13      | 2.44       | 12.03       | 14.77       | 18.37       | 47.33      | 415020   |
| Low-lying vegetation                                                                    | 4.36        | 1.63      | 0.35       | 3.22        | 4.08        | 5.18        | 22.11      | 415020   |
| Grass                                                                                   | 5.30        | 1.79      | 0.10       | 4.03        | 5.08        | 6.32        | 23.09      | 415020   |
| <b>Street view green space 500m, %</b>                                                  |             |           |            |             |             |             |            |          |
| Total green space                                                                       | 25.15       | 3.97      | 16.46      | 22.41       | 24.34       | 27.04       | 64.63      | 415020   |
| Tree                                                                                    | 15.32       | 4.12      | 3.88       | 12.60       | 14.73       | 17.54       | 42.05      | 415020   |
| Low-lying vegetation                                                                    | 4.53        | 1.41      | 1.10       | 3.55        | 4.29        | 5.22        | 17.80      | 415020   |
| Grass                                                                                   | 5.30        | 1.43      | 0.92       | 4.34        | 5.13        | 6.05        | 19.47      | 415020   |
| <b>Street view green space 1000m, %</b>                                                 |             |           |            |             |             |             |            |          |
| Total green space                                                                       | 25.21       | 3.50      | 0.00       | 22.81       | 24.51       | 26.89       | 56.10      | 415020   |
| Tree                                                                                    | 15.23       | 3.67      | 0.00       | 12.93       | 14.69       | 17.22       | 39.85      | 415020   |
| Low-lying vegetation                                                                    | 4.65        | 1.29      | 0.00       | 3.76        | 4.41        | 5.31        | 16.23      | 415020   |
| Grass                                                                                   | 5.33        | 1.28      | 0.00       | 4.51        | 5.19        | 5.92        | 18.78      | 415020   |
| <b>Green space indicators</b>                                                           |             |           |            |             |             |             |            |          |
| Mean annual NDVI 200m, (0-1)                                                            | 0.27        | 0.06      | 0.03       | 0.23        | 0.27        | 0.31        | 0.64       | 415020   |
| Mean annual NDVI 500m (0-1)                                                             | 0.27        | 0.06      | 0.03       | 0.24        | 0.27        | 0.31        | 0.64       | 415020   |
| Mean annual NDVI 1000m (0-1)                                                            | 0.27        | 0.06      | 0.03       | 0.24        | 0.27        | 0.31        | 0.64       | 415020   |
| Land-cover green space 200m, %                                                          | 8.41        | 16.00     | 0.00       | 0.00        | 1.12        | 9.22        | 99.93      | 415020   |
| Land-cover green space 500m, %                                                          | 12.24       | 17.47     | 0.00       | 1.07        | 4.75        | 15.99       | 99.97      | 415020   |
| Land-cover green space 1000m, %                                                         | 15.29       | 18.84     | 0.00       | 2.29        | 6.99        | 21.78       | 99.99      | 415020   |
| Tree canopy cover 200m, %                                                               | 2.03        | 2.61      | 0.00       | 0.33        | 1.15        | 2.68        | 39.17      | 415020   |
| Tree canopy cover 500m, %                                                               | 2.00        | 2.27      | 0.00       | 0.50        | 1.28        | 2.64        | 35.66      | 415020   |
| Tree canopy cover 1000m, %                                                              | 2.02        | 2.11      | 0.00       | 0.62        | 1.37        | 2.69        | 35.46      | 415020   |
| Distance to the nearest park, km                                                        | 0.52        | 0.45      | 0.00       | 0.22        | 0.42        | 0.69        | 0.86       | 415020   |
| <b>Zip code level green space exposure used in within-between random effects models</b> |             |           |            |             |             |             |            |          |
| <b>Street view green space 200m, %</b>                                                  |             |           |            |             |             |             |            |          |
| Total green space                                                                       | 26.31       | 3.97      | 18.56      | 23.42       | 25.78       | 28.51       | 45.36      | 584      |
| Tree                                                                                    | 16.57       | 4.02      | 7.43       | 13.71       | 16.05       | 19.12       | 31.41      | 584      |
| Low-lying vegetation                                                                    | 4.67        | 1.19      | 1.96       | 3.83        | 4.45        | 5.30        | 10.90      | 584      |
| Grass                                                                                   | 5.06        | 1.23      | 1.52       | 4.18        | 4.97        | 5.74        | 10.33      | 584      |
| <b>Street view green space 500m, %</b>                                                  |             |           |            |             |             |             |            |          |
| Total green space                                                                       | 26.23       | 3.90      | 19.25      | 23.34       | 25.65       | 28.43       | 44.65      | 584      |
| Tree                                                                                    | 16.31       | 3.95      | 7.51       | 13.59       | 15.79       | 18.52       | 34.29      | 584      |
| Low-lying vegetation                                                                    | 4.83        | 1.16      | 2.63       | 3.94        | 4.63        | 5.50        | 9.86       | 584      |
| Grass                                                                                   | 5.09        | 1.20      | 2.17       | 4.27        | 4.96        | 5.69        | 10.27      | 584      |
| <b>Street view green space 1000m, %</b>                                                 |             |           |            |             |             |             |            |          |
| Total green space                                                                       | 26.23       | 3.89      | 14.12      | 23.45       | 25.59       | 28.47       | 49.57      | 584      |
| Tree                                                                                    | 16.17       | 3.88      | 7.82       | 13.53       | 15.56       | 18.31       | 34.79      | 584      |
| Low-lying vegetation                                                                    | 4.95        | 1.18      | 2.32       | 4.05        | 4.73        | 5.60        | 10.39      | 584      |
| Grass                                                                                   | 5.11        | 1.20      | 2.34       | 4.33        | 4.96        | 5.71        | 9.96       | 584      |
| <b>Green space indicators</b>                                                           |             |           |            |             |             |             |            |          |
| Mean annual NDVI 200m, (0-1)                                                            | 0.27        | 0.06      | 0.04       | 0.25        | 0.27        | 0.30        | 0.73       | 584      |
| Mean annual NDVI 500m (0-1)                                                             | 0.27        | 0.06      | 0.04       | 0.25        | 0.27        | 0.29        | 0.74       | 584      |

|                                                          |       |       |      |       |       |        |        |        |
|----------------------------------------------------------|-------|-------|------|-------|-------|--------|--------|--------|
| Mean annual NDVI 1000m (0-1)                             | 0.27  | 0.06  | 0.04 | 0.25  | 0.27  | 0.29   | 0.78   | 584    |
| Land-cover green space 200m, %                           | 10.33 | 14.04 | 0.00 | 1.71  | 5.21  | 12.63  | 99.93  | 584    |
| Land-cover green space 500m, %                           | 14.12 | 16.07 | 0.00 | 3.17  | 8.35  | 18.60  | 99.97  | 584    |
| Land-cover green space 1000m, %                          | 17.31 | 17.95 | 0.02 | 4.09  | 11.22 | 24.78  | 99.99  | 584    |
| Tree canopy cover 200m, %                                | 2.56  | 2.45  | 0.00 | 0.93  | 1.83  | 3.66   | 19.31  | 584    |
| Tree canopy cover 500m, %                                | 2.57  | 2.43  | 0.00 | 0.95  | 1.85  | 3.52   | 18.08  | 584    |
| Tree canopy cover 1000m, %                               | 2.62  | 2.46  | 0.00 | 0.98  | 1.96  | 3.58   | 18.05  | 584    |
| Distance to the nearest park, km                         | 0.50  | 0.40  | 0.00 | 0.33  | 0.43  | 0.57   | 7.55   | 584    |
| <b>Annual NDVI levels in the study region over years</b> |       |       |      |       |       |        |        |        |
| 2008                                                     | 0.29  | 0.12  | 0.00 | 0.24  | 0.31  | 0.33   | 0.76   | -      |
| 2009                                                     | 0.29  | 0.12  | 0.00 | 0.24  | 0.30  | 0.32   | 0.78   | -      |
| 2010                                                     | 0.30  | 0.12  | 0.00 | 0.25  | 0.32  | 0.34   | 0.79   | -      |
| 2011                                                     | 0.30  | 0.12  | 0.00 | 0.26  | 0.32  | 0.34   | 0.79   | -      |
| 2012                                                     | 0.28  | 0.12  | 0.00 | 0.23  | 0.30  | 0.32   | 0.77   | -      |
| 2013                                                     | 0.28  | 0.12  | 0.00 | 0.23  | 0.29  | 0.31   | 0.79   | -      |
| 2014                                                     | 0.27  | 0.12  | 0.00 | 0.22  | 0.28  | 0.30   | 0.78   | -      |
| 2015                                                     | 0.28  | 0.12  | 0.00 | 0.24  | 0.30  | 0.31   | 0.75   | -      |
| 2016                                                     | 0.27  | 0.12  | 0.00 | 0.23  | 0.29  | 0.31   | 0.75   | -      |
| 2017                                                     | 0.29  | 0.12  | 0.00 | 0.24  | 0.31  | 0.33   | 0.78   | -      |
| 2018                                                     | 0.27  | 0.12  | 0.00 | 0.23  | 0.29  | 0.30   | 0.78   | -      |
| Physical activity during pregnancy                       | 79.02 | 80.36 | 0.00 | 22.50 | 60.00 | 110.80 | 1050.0 | 337205 |

SD, standard deviation; NDVI, normalized difference vegetation index.

**Supplementary Table S3. Associations between residential green space and maternal postpartum depression among urban population.**

| Postpartum Depression Exposures         | Model A                  |                          | Model B                  |                          | Model C                  |                          | Model D                  |                          | Model E        |               |
|-----------------------------------------|--------------------------|--------------------------|--------------------------|--------------------------|--------------------------|--------------------------|--------------------------|--------------------------|----------------|---------------|
|                                         | OR                       | 95% CI                   | Between effect | Within effect |
| <b>Street view green space 200m, %</b>  |                          |                          |                          |                          |                          |                          |                          |                          |                |               |
| Total green space                       | <b>0.99 (0.97, 0.99)</b> | <b>0.98 (0.97, 0.99)</b> | <b>0.98 (0.97, 0.99)</b> | <b>0.98 (0.97, 0.99)</b> | <b>0.99 (0.97, 0.99)</b> | <b>0.99 (0.97, 0.99)</b> | <b>0.96 (0.93, 0.99)</b> | 0.99 (0.98, 1.01)        |                |               |
| Tree                                    | 0.99 (0.97, 1.00)        | <b>0.98 (0.97, 0.99)</b> | 0.98 (0.97, 1.00)        | 0.99 (0.98, 1.00)        | 0.99 (0.98, 1.00)        | 0.99 (0.98, 1.00)        | <b>0.95 (0.92, 0.97)</b> | 1.00 (0.99, 1.01)        |                |               |
| Low-lying vegetation                    | <b>0.98 (0.97, 0.99)</b> | 0.99 (0.97, 1.00)        | <b>0.98 (0.97, 0.99)</b> | <b>0.99 (0.97, 0.99)</b> | <b>0.99 (0.97, 0.99)</b> | <b>0.99 (0.97, 0.99)</b> | 1.01 (0.99, 1.04)        | <b>0.96 (0.97, 0.99)</b> |                |               |
| Grass                                   | 1.00 (0.99, 1.02)        | 1.00 (0.99, 1.02)        | 1.00 (0.99, 1.02)        | 1.00 (0.99, 1.02)        | 1.00 (0.99, 1.02)        | 1.00 (0.99, 1.02)        | <b>1.05 (1.02, 1.07)</b> | 0.99 (0.98, 1.00)        |                |               |
| <b>Street view green space 500m, %</b>  |                          |                          |                          |                          |                          |                          |                          |                          |                |               |
| Total green space                       | <b>0.98 (0.97, 0.99)</b> | <b>0.98 (0.96, 0.99)</b> | <b>0.98 (0.97, 0.99)</b> | <b>0.98 (0.97, 0.99)</b> | <b>0.98 (0.97, 0.99)</b> | <b>0.98 (0.97, 0.99)</b> | <b>0.96 (0.93, 0.99)</b> | 0.99 (0.98, 1.00)        |                |               |
| Tree                                    | <b>0.98 (0.97, 0.99)</b> | <b>0.98 (0.96, 0.99)</b> | <b>0.98 (0.97, 0.99)</b> | <b>0.98 (0.97, 0.99)</b> | <b>0.98 (0.97, 0.99)</b> | <b>0.98 (0.97, 0.99)</b> | <b>0.95 (0.92, 0.97)</b> | 1.00 (0.98, 1.01)        |                |               |
| Low-lying vegetation                    | 0.99 (0.97, 1.00)        | 0.99 (0.98, 1.00)        | 0.99 (0.97, 1.00)        | 0.99 (0.97, 1.00)        | 0.99 (0.97, 1.00)        | 0.99 (0.97, 1.00)        | 1.01 (0.99, 1.04)        | <b>0.99 (0.98, 0.99)</b> |                |               |
| Grass                                   | 1.01 (0.99, 1.02)        | 1.01 (0.99, 1.02)        | 1.01 (0.99, 1.02)        | 1.01 (0.99, 1.02)        | 1.01 (0.99, 1.02)        | 1.01 (0.99, 1.02)        | <b>1.05 (1.02, 1.07)</b> | 0.99 (0.98, 1.00)        |                |               |
| <b>Street view green space 1000m, %</b> |                          |                          |                          |                          |                          |                          |                          |                          |                |               |
| Total green space                       | <b>0.98 (0.97, 0.99)</b> | <b>0.98 (0.96, 0.99)</b> | <b>0.98 (0.97, 0.99)</b> | <b>0.98 (0.97, 0.99)</b> | <b>0.98 (0.97, 0.99)</b> | <b>0.98 (0.97, 0.99)</b> | <b>0.96 (0.93, 0.99)</b> | 0.99 (0.99, 1.01)        |                |               |
| Tree                                    | <b>0.98 (0.96, 0.99)</b> | <b>0.97 (0.96, 0.99)</b> | <b>0.98 (0.96, 0.99)</b> | <b>0.98 (0.96, 0.99)</b> | <b>0.98 (0.96, 0.99)</b> | <b>0.98 (0.96, 0.99)</b> | <b>0.95 (0.92, 0.97)</b> | 1.00 (0.99, 1.01)        |                |               |
| Low-lying vegetation                    | 0.99 (0.97, 1.01)        | 0.99 (0.98, 1.01)        | 0.99 (0.97, 1.01)        | 0.99 (0.97, 1.01)        | 0.99 (0.97, 1.01)        | 0.99 (0.97, 1.01)        | 1.01 (0.99, 1.04)        | <b>0.99 (0.98, 0.99)</b> |                |               |
| Grass                                   | <b>1.02 (1.01, 1.03)</b> | <b>1.02 (1.01, 1.03)</b> | 1.02 (1.00, 1.03)        | 1.02 (1.00, 1.03)        | 1.02 (1.00, 1.03)        | 1.02 (1.00, 1.03)        | <b>1.05 (1.03, 1.07)</b> | 1.00 (0.99, 1.01)        |                |               |
| <b>Green space indicators</b>           |                          |                          |                          |                          |                          |                          |                          |                          |                |               |
| NDVI 200m, (0-1)                        | 1.01 (0.99, 1.02)        | 1.01 (0.99, 1.03)        | 1.01 (0.99, 1.02)        | 1.01 (0.99, 1.02)        | 1.01 (0.99, 1.02)        | 1.01 (0.99, 1.02)        | <b>1.09 (1.07, 1.12)</b> | <b>0.99 (0.98, 0.99)</b> |                |               |
| NDVI 500m, (0-1)                        | 1.02 (1.00, 1.04)        | <b>1.02 (1.01, 1.04)</b> | <b>1.09 (1.06, 1.12)</b> | 0.99 (0.98, 1.00)        |                |               |
| NDVI 1000m, (0-1)                       | 1.01 (0.99, 1.02)        | 1.01 (0.99, 1.03)        | 1.01 (0.99, 1.026)       | 1.01 (0.99, 1.02)        | 1.01 (0.99, 1.02)        | 1.01 (0.99, 1.02)        | <b>1.09 (1.07, 1.12)</b> | 0.99 (0.98, 1.00)        |                |               |
| Land-cover green space 200m, %          | 1.00 (0.99, 1.01)        | 0.99 (0.99, 1.01)        | 1.00 (0.99, 1.01)        | 1.00 (0.99, 1.01)        | 1.00 (0.99, 1.01)        | 1.00 (0.99, 1.01)        | <b>1.04 (1.02, 1.06)</b> | 1.00 (0.99, 1.00)        |                |               |
| Land-cover green space 500m, %          | 1.00 (0.99, 1.02)        | 1.00 (0.99, 1.02)        | 1.00 (0.99, 1.01)        | 1.00 (0.99, 1.01)        | 1.00 (0.99, 1.02)        | 1.00 (0.99, 1.02)        | <b>1.06 (1.04, 1.08)</b> | 0.99 (0.99, 1.00)        |                |               |
| Land-cover green space 1000m, %         | 1.01 (1.00, 1.02)        | 1.01 (0.99, 1.03)        | 1.01 (0.99, 1.02)        | 1.01 (0.99, 1.02)        | 1.01 (1.00, 1.02)        | 1.01 (1.00, 1.02)        | <b>1.07 (1.04, 1.09)</b> | 0.99 (0.99, 1.00)        |                |               |
| Tree canopy cover 200m, %               | <b>0.99 (0.98, 0.99)</b> | <b>0.97 (0.95, 0.99)</b> | 1.00 (0.99, 1.00)        |                |               |
| Tree canopy cover 500m, %               | <b>0.98 (0.97, 0.99)</b> | <b>0.96 (0.94, 0.99)</b> | 0.99 (0.99, 1.00)        |                |               |
| Tree canopy cover 1000m, %              | <b>0.98 (0.96, 0.99)</b> | <b>0.98 (0.96, 0.99)</b> | <b>0.98 (0.97, 0.99)</b> | <b>0.98 (0.97, 0.99)</b> | <b>0.98 (0.97, 0.99)</b> | <b>0.98 (0.97, 0.99)</b> | <b>0.96 (0.94, 0.98)</b> | 0.99 (0.99, 1.00)        |                |               |
| Park<500m, yes vs. no                   | 1.00 (0.99, 1.01)        | 1.00 (0.98, 1.02)        | 1.00 (0.98, 1.02)        | 1.00 (0.98, 1.02)        | 1.00 (0.98, 1.02)        | 1.00 (0.98, 1.02)        | 1.00 (0.99, 1.00)        | 1.00 (0.99, 1.02)        |                |               |
| Physical activity during pregnancy      | <b>0.93 (0.91, 0.94)</b> | <b>0.92 (0.90, 0.93)</b> | <b>0.92 (0.90, 0.93)</b> | <b>0.92 (0.90, 0.93)</b> | <b>0.92 (0.90, 0.93)</b> | <b>0.92 (0.91, 0.94)</b> | -                        | <b>0.93 (0.92, 0.94)</b> |                |               |

NDVI, normalized difference vegetation index. Odds ratios (ORs) and 95% confidence intervals (CIs) were calculated for per interquartile range (IQR) increment for green space indicators.

Model A: Models adjusted for maternal age, race/ethnicity, educational level, and block group household income. Zip code was fitted as a random effect.

Model B: Model A + further adjusted for smoking during pregnancy, season of conception, year of infant birth, insurance type, preterm birth, and pregnancy-related comorbidities (preeclampsia, gestational hypertension and gestational diabetes).

Model C: (n=398,616) Models A + excluding infants conceived > 19 weeks before 1 January 2008 or < 43 weeks before 31 December 2018.

---

Model D: Models A + multiple delivery as a random effect.

Model E (within-between random effects models):  $y_{ir} = \beta_0 + \beta_{1W}(x_{ir} - \bar{x}_r) + \beta_{2B}\bar{x}_r + \beta_3 z_i + (v_r + \epsilon_{ir})$ .

Here, for individual  $i$  and region  $r$ ,  $\beta_{1W}$  represents the within region effect, while  $\beta_{2B}$  represents the between effect. The within effects reflect remaining individual-level effects after accounting for the between effects (i.e., individual observations clustered by zip code), while between effects reflect neighborhood-level effects (i.e., zip code in this study) with keeping the deviation constant. Confounder adjustments are denoted using simplified notation  $\beta_3 z_i$ ,  $v_r$  are the zip code random effects, the  $\epsilon_{ir}$  are the model's residuals for individuals.

Significant results were bolded.



**Supplementary Table S4. Adjusted odds ratios (ORs) and 95% confidence intervals (CI) of postpartum depression associated with street view based total green space (500 m) among population subgroups.**

| Description                    | ORs per IQR green space indicators | 95% CI |      | p value for Cochrane's Q test |
|--------------------------------|------------------------------------|--------|------|-------------------------------|
| <b>Maternal age</b>            |                                    |        |      |                               |
| < 25                           | 1.03                               | 1.00   | 1.07 | <0.0001                       |
| 25-34                          | 0.98                               | 0.97   | 1.00 |                               |
| ≥ 35                           | 0.95                               | 0.92   | 0.97 |                               |
| <b>Maternal race/ethnicity</b> |                                    |        |      |                               |
| African American               | 1.03                               | 0.97   | 1.08 | 0.001                         |
| Asian                          | 0.95                               | 0.91   | 0.99 |                               |
| Hispanic                       | 1.00                               | 0.98   | 1.03 |                               |
| Non-Hispanic white             | 0.95                               | 0.93   | 0.97 |                               |
| Multiple/other                 | 0.99                               | 0.92   | 1.05 |                               |
| <b>Household income</b>        |                                    |        |      |                               |
| Low (Q1-Q2)                    | 1.00                               | 0.98   | 1.02 | 0.021                         |
| High (Q3-Q4)                   | 0.96                               | 0.95   | 0.98 |                               |
| <b>Maternal education</b>      |                                    |        |      |                               |
| < College                      | 1.01                               | 0.99   | 1.04 | 0.003                         |
| ≥ College                      | 0.97                               | 0.95   | 0.98 |                               |

ORs and 95% CIs were calculated for per interquartile range (IQR) increment for green space indicators. Models adjusted for maternal age, race/ethnicity, educational level, and block group household income. Zip code was fitted as a random effect.

**Supplementary Table S5. Percent change and 95% confidence intervals of associations between green space and physical activity during the entire pregnancy.**

| <b>Green space exposures</b>              | <b>Percent change, 95%CI</b> |                        |
|-------------------------------------------|------------------------------|------------------------|
| <b>Street view green space 200m, 10%</b>  |                              |                        |
| Total green space                         | 0.49                         | (-0.35, 1.32)          |
| Tree                                      | 0.75                         | (-0.12, 1.61)          |
| Low-lying vegetation                      | 1.79                         | (-0.80, 4.38)          |
| Grass                                     | <b>-3.22</b>                 | <b>(-5.58, -0.87)</b>  |
| <b>Street view green space 500m, 10%</b>  |                              |                        |
| Total green space                         | <b>1.92</b>                  | <b>(0.72, 3.13)</b>    |
| Tree                                      | <b>2.70</b>                  | <b>(1.46, 3.95)</b>    |
| Low-lying vegetation                      | 1.86                         | (-1.49, 5.21)          |
| Grass                                     | <b>-7.04</b>                 | <b>(-10.50, -3.57)</b> |
| <b>Street view green space 1000m, 10%</b> |                              |                        |
| Total green space                         | <b>1.97</b>                  | <b>(0.42, 3.51)</b>    |
| Tree                                      | <b>3.65</b>                  | <b>(2.02, 5.28)</b>    |
| Low-lying vegetation                      | 2.14                         | (-1.97, 6.25)          |
| Grass                                     | <b>-13.73</b>                | <b>(-18.18, -9.29)</b> |
| <b>Green space indicators</b>             |                              |                        |
| NDVI 200m, 0.1                            | <b>1.29</b>                  | <b>(0.12, 2.46)</b>    |
| NDVI 500m, 0.1                            | 1.32                         | (-0.01, 2.65)          |
| NDVI 1000m, 0.1                           | <b>1.34</b>                  | <b>(0.14, 2.54)</b>    |
| Land-cover greenness 200m, 10%            | 0.12                         | (-0.14, -0.38)         |
| Land-cover greenness 500m, 10%            | -0.01                        | (-0.03, 0.02)          |
| Land-cover greenness 1000m, 10%           | -0.01                        | (-0.03, 0.02)          |
| Tree canopy cover 200m, 10%               | <b>3.80</b>                  | <b>(2.09, 5.52)</b>    |
| Tree canopy cover 500m, 10%               | <b>5.55</b>                  | <b>(3.31, 7.79)</b>    |
| Tree canopy cover 1000m, 10%              | <b>6.55</b>                  | <b>(3.82, 9.28)</b>    |
| Proximity to the nearest park, 0.1km      | <b>0.13</b>                  | <b>(0.04, 0.22)</b>    |

NDVI, normalized difference vegetation index. All models adjusted for maternal age, race/ethnicity, educational level, and block group household income. Zip code was fitted as a random effect. Significant results were bolded.
